# Supplementary material for: Structural diversity and properties of coordination polymers built from a semi-rigid tetradentenate carboxylic acid
Source: Royal Society of Chemistry journal article supplement (doi:10.1039/c1ce05931a), 2011-11-11
Supplement: c1ce05931a.pdf [file c1ce05931a.pdf]

## Structural diversity and properties of coordination polymers built from a semirigid tetradentate carboxylic acid

Ling-Ling Qu, You-Long Zhu, Jun Zhang, Yi-Zhi Li, Hong-Bin Du\*, Xiao-Zeng You

*State Key Laboratory of Coordination Chemistry and Nanjing National Laboratory of Microstructures, School of Chemistry and Chemical Engineering, Nanjing University, Nanjing, 210093, China.*

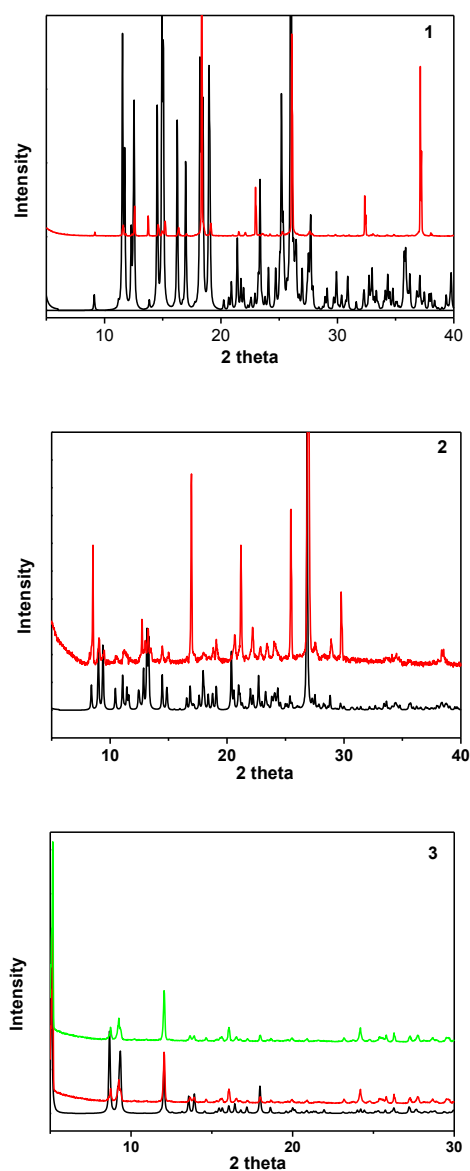

**Figure S1.** PXRD patterns for **1-3**: the as-synthesized (red), the simulated based on X-ray single-crystal data (black) and the **activated sample** (green).

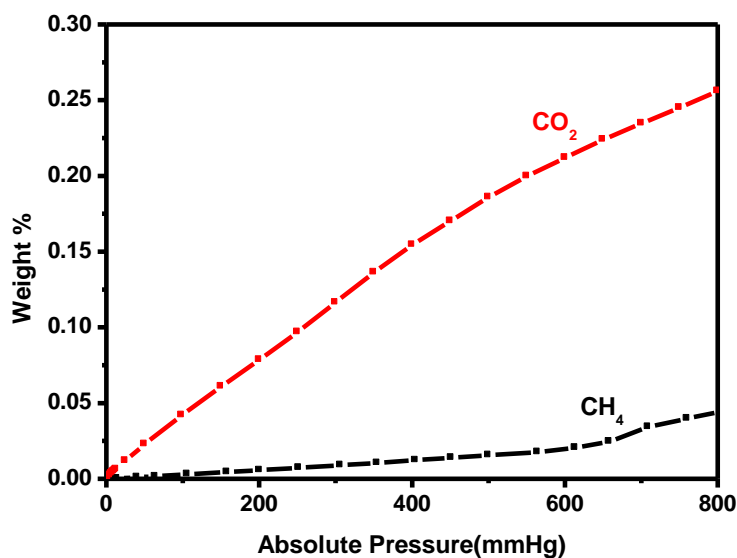

**Figure S2.** CH<sub>4</sub> and CO<sub>2</sub> adsorption isotherms for **3** at 273 K.

**Table S1.** Selected bond distances (Å) and angles (deg) for **1–3**

| <b>1</b>                                |             |                                           |             |
|-----------------------------------------|-------------|-------------------------------------------|-------------|
| Zn1–O1                                  | 2.168 (3)   | Zn1–O2                                    | 1.964 (3)   |
| Zn1–O3                                  | 2.117 (3)   | Zn1–O4 <sup>iii</sup>                     | 1.940 (3)   |
| Zn1–O5                                  | 1.951 (3)   |                                           |             |
| O2–Zn1–O1                               | 92.47 (13)  | O2–Zn1–O3                                 | 86.90 (12)  |
| O3–Zn1–O1                               | 172.84 (13) | O4 <sup>iii</sup> –Zn1–O1                 | 88.75 (12)  |
| O4 <sup>iii</sup> –Zn1–O2               | 135.10 (11) | O4 <sup>iii</sup> –Zn1–O3                 | 86.68 (12)  |
| O4 <sup>iii</sup> –Zn1–O5               | 129.96 (12) | O5–Zn1–O1                                 | 91.50 (12)  |
| O5–Zn1–O2                               | 94.89 (12)  | O5–Zn1–O3                                 | 95.66 (13)  |
| <b>2</b>                                |             |                                           |             |
| Co1–O9                                  | 2.040 (2)   | Co1–O10                                   | 2.414 (2)   |
| Co1–O11                                 | 2.014 (3)   | Co1–O1W                                   | 2.096 (3)   |
| Co1–O1W <sup>ii</sup>                   | 2.302 (3)   | Co1–O2W                                   | 2.458 (6)   |
| O9–Co1–O1W                              | 135.02 (10) | O9–Co1–O1W <sup>ii</sup>                  | 87.26 (10)  |
| O11–Co1–O9                              | 90.47 (11)  | O11–Co1–O1W                               | 129.06 (10) |
| O11–Co1–O1W <sup>ii</sup>               | 87.77 (10)  | O1W–Co1–O1W <sup>ii</sup>                 | 75.55 (11)  |
| <b>3</b>                                |             |                                           |             |
| Cd1–O1                                  | 2.243 (4)   | Cd1–O7 <sup>v</sup>                       | 2.315 (3)   |
| Cd1–O10 <sup>iii</sup>                  | 2.285 (4)   | Cd2–O2 <sup>vii</sup>                     | 2.186 (4)   |
| Cd2–O3 <sup>viii</sup>                  | 2.301 (4)   | Cd2–O4 <sup>viii</sup>                    | 2.381 (4)   |
| Cd2–O7                                  | 2.326 (3)   | Cd2–O8                                    | 2.493 (4)   |
| Cd2–O9 <sup>ix</sup>                    | 2.310 (4)   | Cd2–O10 <sup>ix</sup>                     | 2.645 (4)   |
| O1–Cd1–O1 <sup>ii</sup>                 | 179.999 (1) | O1–Cd1–O7 <sup>v</sup>                    | 90.08 (13)  |
| O1–Cd1–O7 <sup>vi</sup>                 | 89.92 (13)  | O1–Cd1–O10 <sup>iii</sup>                 | 91.26 (14)  |
| O1–Cd1–O10 <sup>iv</sup>                | 88.74 (14)  | O10 <sup>iii</sup> –Cd1–O10 <sup>iv</sup> | 180.000 (1) |
| O10 <sup>iii</sup> –Cd1–O7 <sup>v</sup> | 77.22 (14)  | O10 <sup>iv</sup> –Cd1–O7 <sup>v</sup>    | 102.78 (14) |

|                                            |            |                                           |            |
|--------------------------------------------|------------|-------------------------------------------|------------|
| 02 <sup>vii</sup> -Cd2-03 <sup>viii</sup>  | 154.23(14) | 02 <sup>vii</sup> -Cd2-04 <sup>viii</sup> | 98.22(13)  |
| 02 <sup>vii</sup> -Cd2-07                  | 100.22(14) | 02 <sup>vii</sup> -Cd2-08                 | 88.31(14)  |
| 02 <sup>vii</sup> -Cd2-09 <sup>ix</sup>    | 95.53(14)  | 02 <sup>vii</sup> -Cd2-010 <sup>ix</sup>  | 99.11(14)  |
| 03 <sup>viii</sup> -Cd2-04 <sup>viii</sup> | 56.06(13)  | 03 <sup>viii</sup> -Cd2-07                | 98.59(13)  |
| 03 <sup>viii</sup> -Cd2-08                 | 88.88(13)  | 03 <sup>viii</sup> -Cd2-09 <sup>ix</sup>  | 89.31(13)  |
| 03 <sup>viii</sup> -Cd2-010 <sup>ix</sup>  | 103.76(13) | 04 <sup>viii</sup> -Cd2-08                | 87.57(12)  |
| 04 <sup>viii</sup> -Cd2-010 <sup>ix</sup>  | 144.60(13) | 07-Cd2-04 <sup>viii</sup>                 | 135.78(12) |
| 07-Cd2-08                                  | 53.43(12)  | 07-Cd2-010 <sup>ix</sup>                  | 70.20(13)  |
| 08-Cd2-010 <sup>ix</sup>                   | 123.51(12) | 09 <sup>ix</sup> -Cd2-04 <sup>viii</sup>  | 95.68(13)  |
| 09 <sup>ix</sup> -Cd2-07                   | 121.86(13) | 09 <sup>ix</sup> -Cd2-08                  | 174.56(13) |
| 09 <sup>ix</sup> -Cd2-010 <sup>ix</sup>    | 52.10(13)  |                                           |            |

Symmetry transformations used to generate equivalent atoms: For **1**: i, -x+1, -y+1, -z; iii, -x+1, -y+1, -z+1. For **2**: ii, -x+2, -y+2, -z+2. For **3**: i, x, y-1, z-1; ii, -x+1, -y+1, -z-1; iii, x-1, y, z-1; iv, -x+2, -y+1, -z; v, x, y, z-1; vi, -x+1, -y+1, -z; vii, x, y, z+1; viii, x, y+1, z+1; ix, x-1, y, z.

**Table S2.** Hydrogen-Bonding Geometries (Å, deg) for **1** and **2**

| D-H...A       | dD...A | dH...A | ∠D-H...A |
|---------------|--------|--------|----------|
| <b>1</b>      |        |        |          |
| O3-H3A...O8   | 2.691  | 1.79   | 154      |
| O9-H9C...O4   | 2.679  | 1.76   | 160      |
| O12-H12D...O8 | 3.087  | 2.21   | 151      |
| <b>2</b>      |        |        |          |
| O1W-H1X...O3  | 2.722  | 1.93   | 155      |
| O1W-H1Y...O2  | 2.708  | 1.88   | 165      |
| O2W-H2Y...O9  | 3.248  | 2.57   | 137      |
| O4-H4C...O8   | 3.213  | 2.55   | 126      |
| O8-H8A...O13  | 2.614  | 1.69   | 160      |
| O14-H14C...O7 | 2.598  | 1.84   | 134      |
| C3-H3...O4W   | 3.279  | 2.36   | 170      |
| C22-H22...O1  | 3.450  | 2.6    | 152      |
| C33-H33A...O6 | 3.532  | 2.59   | 163      |
